# Supplementary material for: Gerechtigkeit in der Dienstplanung: die Auswirkung auf die Arbeitszufriedenheit in der Pflege und die Sicht der Planungsverantwortlichen
Source: Springer Nature journal article supplement (doi:10.1007/s16024-024-00403-2), 2024-02-05
Supplement: MOESM1 [file 26704808]

## **Interviewleitfaden**

### **Zielsetzung:**

Ziel ist es zu erfahren, wie Planungsverantwortliche die Dienstplanung in der Pflege in Bezug auf die Gerechtigkeit beschreiben und wahrnehmen. Weiter soll beschrieben werden, inwiefern der Aspekt der Gerechtigkeit in die Dienstplanung miteinfließt.

### **Beginn des Interviews:**

- Begrüssung
- Danksagung
- Vorstellung
- Information über Ziel und Zweck des Interviews
- Information über Zeitrahmen des Interviews (ca. 45 – 60 Minuten)
- Information über Tonbandaufnahme
- Information über Vertraulichkeit und Pseudonymisierung der Daten
- Information über Einwilligungserklärung, Einwilligungserklärung unterzeichnen

### **Tonbandaufnahme starten**

| Einstiegsphase                                                                                                                                                                                                                                                |                                                                                                                                                                                                                                                                                                                                                                                                                                                                                                                                                                                                                                                                                                                                                   |                                                                                                                                                                                                                                                                                                                         |
|---------------------------------------------------------------------------------------------------------------------------------------------------------------------------------------------------------------------------------------------------------------|---------------------------------------------------------------------------------------------------------------------------------------------------------------------------------------------------------------------------------------------------------------------------------------------------------------------------------------------------------------------------------------------------------------------------------------------------------------------------------------------------------------------------------------------------------------------------------------------------------------------------------------------------------------------------------------------------------------------------------------------------|-------------------------------------------------------------------------------------------------------------------------------------------------------------------------------------------------------------------------------------------------------------------------------------------------------------------------|
| 1. Leitfrage: Wie nehmen Sie <i>denn</i> die Dienstplanung auf Ihrer Abteilung wahr?                                                                                                                                                                          |                                                                                                                                                                                                                                                                                                                                                                                                                                                                                                                                                                                                                                                                                                                                                   |                                                                                                                                                                                                                                                                                                                         |
| <b>Inhaltliche Aspekte:</b> <ul style="list-style-type: none"> <li>- Dienstplanung in der Pflege</li> </ul>                                                                                                                                                   | <b>Konkrete Nachfragen:</b> <ul style="list-style-type: none"> <li>- Wie gehen Sie <i>denn</i> normalerweise bei der Dienstplanung vor?</li> <li>- Was gibt es <i>denn</i> aus Ihrer Sicht bei der Dienstplanung für Herausforderungen?</li> <li>- Was würden Sie <i>denn</i> aus Ihrer Sicht an der Momentanen Dienstplanung optimieren?</li> </ul>                                                                                                                                                                                                                                                                                                                                                                                              | <b>Aufrechterhaltungsfragen:</b> <ul style="list-style-type: none"> <li>- Gibt es sonst noch etwas?</li> <li>- Können Sie mir dazu noch etwas mehr erzählen?</li> <li>- Können Sie das noch etwas genauer beschreiben?</li> <li>- Haben Sie ein Beispiel dafür, damit ich mir das konkreter vorstellen kann?</li> </ul> |
| Hauptphase                                                                                                                                                                                                                                                    |                                                                                                                                                                                                                                                                                                                                                                                                                                                                                                                                                                                                                                                                                                                                                   |                                                                                                                                                                                                                                                                                                                         |
| 2. Leitfrage: Wie werden <i>denn</i> die Pflegenden normalerweise in die Dienstplanung einbezogen?                                                                                                                                                            |                                                                                                                                                                                                                                                                                                                                                                                                                                                                                                                                                                                                                                                                                                                                                   |                                                                                                                                                                                                                                                                                                                         |
| <b>Inhaltliche Aspekte:</b> <ul style="list-style-type: none"> <li>- Prozedurale Gerechtigkeit             <ul style="list-style-type: none"> <li>- Einbezug von Mitarbeitenden</li> <li>- Toleranz gegenüber Sicht von Mitarbeitenden</li> </ul> </li> </ul> | <b>Konkrete Nachfragen:</b> <ul style="list-style-type: none"> <li>- Haben <i>denn</i> die Pflegenden der unterschiedlichen Funktionsstufen (Pflegefachpersonen, FaGe, PA) alle gleich viel Mitspracherecht in der Dienstplanung?             <ul style="list-style-type: none"> <li>- Wenn ja: wie gewährleisten Sie denn, dass sich alle gleichermassen in die Dienstplanung einbringen können?</li> </ul> </li> <li>- Was denken Sie <i>denn</i>, wann nehmen Pflegende die Dienstplanung als gerecht wahr?</li> <li>- Können sich <i>denn</i> die Pflegenden bei Unzufriedenheiten mit der Dienstplanung einbringen?             <ul style="list-style-type: none"> <li>- Wie kann ich mir das <i>denn</i> vorstellen?</li> </ul> </li> </ul> | <b>Aufrechterhaltungsfragen:</b> <ul style="list-style-type: none"> <li>- Gibt es sonst noch etwas?</li> <li>- Können Sie mir dazu noch etwas mehr erzählen?</li> <li>- Können Sie das noch etwas genauer beschreiben?</li> <li>- Haben Sie ein Beispiel dafür, damit ich mir das konkreter vorstellen kann?</li> </ul> |

| 3. Leitfrage: Haben Sie <i>denn</i> das Gefühl, dass Pflegende, welche eine bessere Leistung erbringen, eine bessere Dienstplanung haben?                                                                                                                                       |                                                                                                                                                                                                                                                                                                                                                                                                                                                                                                                                             |                                                                                                                                                                                                                                                                                                                         |
|---------------------------------------------------------------------------------------------------------------------------------------------------------------------------------------------------------------------------------------------------------------------------------|---------------------------------------------------------------------------------------------------------------------------------------------------------------------------------------------------------------------------------------------------------------------------------------------------------------------------------------------------------------------------------------------------------------------------------------------------------------------------------------------------------------------------------------------|-------------------------------------------------------------------------------------------------------------------------------------------------------------------------------------------------------------------------------------------------------------------------------------------------------------------------|
| <b>Inhaltliche Aspekte:</b> <ul style="list-style-type: none"> <li>- Distributive Gerechtigkeit               <ul style="list-style-type: none"> <li>- Gerechtigkeit der Dienstplanung</li> <li>- Neutrale, objektive Haltung bei der Dienstplanung</li> </ul> </li> </ul>      | <b>Konkrete Nachfragen:</b> <ul style="list-style-type: none"> <li>- Was denken Sie <i>denn</i>, wirkt sich die Leistung der Pflegenden auf die Dienstplanung aus?</li> <li>- Wenn nein: Wie gelingt es Ihnen <i>denn</i>, die Dienstplanung aus Ihrer Sicht gerecht zu gestalten?</li> <li>- Wenn ja: Wie gelingt es Ihnen <i>dennoch</i>, die Dienstplanung aus Ihrer Sicht gerecht zu gestalten?</li> <li>- Wie erreichen Sie <i>denn</i>, dass die Dienstplanung von den Pflegenden möglichst als gerecht wahrgenommen wird?</li> </ul> | <b>Aufrechterhaltungsfragen:</b> <ul style="list-style-type: none"> <li>- Gibt es sonst noch etwas?</li> <li>- Können Sie mir dazu noch etwas mehr erzählen?</li> <li>- Können Sie das noch etwas genauer beschreiben?</li> <li>- Haben Sie ein Beispiel dafür, damit ich mir das konkreter vorstellen kann?</li> </ul> |
| 4. Leitfrage: Was denken Sie <i>denn</i> , wie wirkt sich die Beziehung zwischen Ihnen und den Pflegenden auf die Dienstplanung aus?                                                                                                                                            |                                                                                                                                                                                                                                                                                                                                                                                                                                                                                                                                             |                                                                                                                                                                                                                                                                                                                         |
| <b>Inhaltliche Aspekte:</b> <ul style="list-style-type: none"> <li>- Interpersonale Gerechtigkeit               <ul style="list-style-type: none"> <li>- Auswirkung der Beziehung zwischen Planungsverantwortlichen und Pflegenden auf die Dienstplanung</li> </ul> </li> </ul> | <b>Konkrete Nachfragen:</b> <ul style="list-style-type: none"> <li>- Was denken Sie <i>denn</i>, inwiefern wird die Dienstplanung durch die Beziehung zwischen Ihnen und den Pflegenden beeinflusst?</li> <li>- Wie gehen Sie <i>denn</i> mit dieser Tatsache um?</li> <li>- Haben Sie <i>denn</i> bei der Erstellung der Dienstplanung besondere Handlungsgrundsätze oder Prinzipien?</li> <li>- Wie gelingt es Ihnen <i>denn eigentlich</i>, bei der Erstellung der Dienstplanung eine neutrale Haltung einzunehmen?</li> </ul>           | <b>Aufrechterhaltungsfragen:</b> <ul style="list-style-type: none"> <li>- Gibt es sonst noch etwas?</li> <li>- Können Sie mir dazu noch etwas mehr erzählen?</li> <li>- Können Sie das noch etwas genauer beschreiben?</li> <li>- Haben Sie ein Beispiel dafür, damit ich mir das konkreter vorstellen kann?</li> </ul> |

| 5. Leitfrage: Erzählen Sie mir <i>doch bitte</i> , wie informieren Sie die Pflegenden bezüglich der Dienstplanung?                                                                                                                                                                                      |                                                                                                                                                                                                                                                                                                                                                                                                                                                                                                                          |                                                                                                                                                                                                                                                                                                                         |
|---------------------------------------------------------------------------------------------------------------------------------------------------------------------------------------------------------------------------------------------------------------------------------------------------------|--------------------------------------------------------------------------------------------------------------------------------------------------------------------------------------------------------------------------------------------------------------------------------------------------------------------------------------------------------------------------------------------------------------------------------------------------------------------------------------------------------------------------|-------------------------------------------------------------------------------------------------------------------------------------------------------------------------------------------------------------------------------------------------------------------------------------------------------------------------|
| <b>Inhaltliche Aspekte:</b> <ul style="list-style-type: none"> <li>- Informationale Gerechtigkeit               <ul style="list-style-type: none"> <li>- Kommunikation zwischen Planungsverantwortlichen und Pflegenden</li> </ul> </li> <li>- Informationsfluss bezüglich der Dienstplanung</li> </ul> | <b>Konkrete Nachfragen:</b> <ul style="list-style-type: none"> <li>- Sind die Pflegenden <i>denn</i> über das Vorgehen informiert, wie und nach welchen Kriterien Sie die Dienstplanung erstellen?</li> <li>- Haben die Pflegenden <i>denn</i> jederzeit die Möglichkeit, Fragen bezüglich der Dienstplanung zu stellen?</li> <li>- Erhalten <i>denn</i> die Dienstplanung alle Pflegenden zum selben Zeitpunkt?</li> <li>- Wie stellen Sie <i>denn</i> sicher, dass der Informationsfluss gewährleistet ist?</li> </ul> | <b>Aufrechterhaltungsfragen:</b> <ul style="list-style-type: none"> <li>- Gibt es sonst noch etwas?</li> <li>- Können Sie mir dazu noch etwas mehr erzählen?</li> <li>- Können Sie das noch etwas genauer beschreiben?</li> <li>- Haben Sie ein Beispiel dafür, damit ich mir das konkreter vorstellen kann?</li> </ul> |
| Abschlussphase                                                                                                                                                                                                                                                                                          |                                                                                                                                                                                                                                                                                                                                                                                                                                                                                                                          |                                                                                                                                                                                                                                                                                                                         |
| 6. Leitfrage: Jetzt haben wir einiges besprochen. Gibt es von Ihrer Seite her noch etwas, was Ihnen zu diesem Thema wichtig ist und Sie gerne noch erzählen möchten?                                                                                                                                    |                                                                                                                                                                                                                                                                                                                                                                                                                                                                                                                          |                                                                                                                                                                                                                                                                                                                         |

## **Tonbandaufnahme beenden**

### **Soziodemografische Angaben (Abgabe Fragebogen):**

- Bitte nennen Sie Ihr Geschlecht
- Bitte nennen Sie Ihr Alter
- Bitte nennen Sie, in welchem Versorgungsbereich Sie arbeiten
- Bitte nennen Sie Ihren höchsten Bildungsabschluss
- Sie sind für die Dienstplanung zuständig, wie lange arbeiten Sie im Betrieb bereits in dieser Funktion?

### **Ende des Interviews:**

- Nochmals Danksagung
- Offene Fragen klären
- Weiters Vorgehen aufzeigen
