# Supplementary material for: Gerechtigkeit in der Dienstplanung: die Auswirkung auf die Arbeitszufriedenheit in der Pflege und die Sicht der Planungsverantwortlichen
Source: Springer Nature journal article supplement (doi:10.1007/s16024-024-00403-2), 2024-02-05
Supplement: MOESM2 [file 26704808]

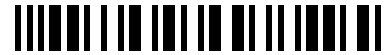

## Teil A: Demografische Angaben

**A1. Bitte nennen Sie Ihr Geschlecht**

|          |                          |
|----------|--------------------------|
| weiblich | <input type="checkbox"/> |
| männlich | <input type="checkbox"/> |
| anderes  | <input type="checkbox"/> |

**A2. In welchem Jahr wurden Sie geboren?**

|                      |                      |                      |                      |                      |                      |                      |                      |                      |                      |
|----------------------|----------------------|----------------------|----------------------|----------------------|----------------------|----------------------|----------------------|----------------------|----------------------|
| <input type="text"/> |
|----------------------|----------------------|----------------------|----------------------|----------------------|----------------------|----------------------|----------------------|----------------------|----------------------|

## Teil B: Bildung

**B1. Welches ist Ihr höchster Bildungsabschluss?**

|                                                                                                       |                          |
|-------------------------------------------------------------------------------------------------------|--------------------------|
| Kein Bildungsabschluss                                                                                | <input type="checkbox"/> |
| Sekundarstufe II; Berufliche Grundbildung (Lehre) / Berufsattest / Fähigkeitszeugnis / Maturität      | <input type="checkbox"/> |
| Tertiärstufe; Höhere Fachschule / Altrechtliche Ausbildung (z.B. DNII, AKP, PsyKP) / NDS              | <input type="checkbox"/> |
| Fachhochschule / Universität; Hochschulabschluss auf Bachelorniveau                                   | <input type="checkbox"/> |
| Fachhochschule / Universität; Hochschulabschluss auf Masterniveau (konsekutiv ohne Weiterbildung MAS) | <input type="checkbox"/> |
| Fachhochschule / Universität; Doktorat / PhD                                                          | <input type="checkbox"/> |

## Teil C: Betreuung

**C1. Haben Sie Betreuungsaufgaben für Kinder ausserhalb der beruflichen?**

|      |                          |
|------|--------------------------|
| Ja   | <input type="checkbox"/> |
| Nein | <input type="checkbox"/> |

**C2. Haben Sie andere Pflege-/Betreuungsaufgaben ausserhalb der beruflichen? (z.B. Pflege von erkrankten Angehörigen, ohne die reguläre Kinderbetreuung)**

|      |                          |
|------|--------------------------|
| Ja   | <input type="checkbox"/> |
| Nein | <input type="checkbox"/> |

## Teil D: Beschäftigungsgrad

**D1. In welchem Beschäftigungsgrad sind Sie in dieser Organisation aktuell angestellt? (Gesamthaft)**

Angabe in Prozent

|     |                          |
|-----|--------------------------|
| 100 | <input type="checkbox"/> |
| 99  | <input type="checkbox"/> |
| 98  | <input type="checkbox"/> |
| 97  | <input type="checkbox"/> |
| 96  | <input type="checkbox"/> |
| 95  | <input type="checkbox"/> |
| 94  | <input type="checkbox"/> |
| 93  | <input type="checkbox"/> |
| 92  | <input type="checkbox"/> |
| 91  | <input type="checkbox"/> |
| 90  | <input type="checkbox"/> |
| 89  | <input type="checkbox"/> |
| 88  | <input type="checkbox"/> |
| 87  | <input type="checkbox"/> |
| 86  | <input type="checkbox"/> |

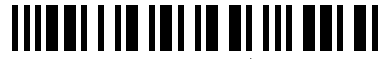

85  
84  
83  
82  
81  
80  
79  
78  
77  
76  
75  
74  
73  
72  
71  
70  
69  
68  
67  
66  
65  
64  
63  
62  
61  
60  
59  
58  
57  
56  
55  
54  
53  
52  
51  
50  
49  
48  
47  
46  
45  
44  
43  
42  
41  
40  
39  
38  
37  
36  
35  
34  
33

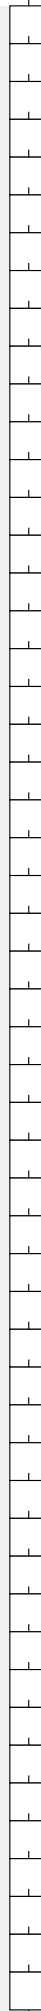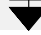







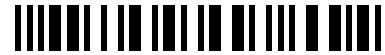

# Teil H: Planungsverantwortung

## H1. Sind Sie für die Dienstplanung in Ihrem Team verantwortlich?

*\* Dies ist eine Pflichtfrage.*

|      |                          |
|------|--------------------------|
| Ja   | <input type="checkbox"/> |
| Nein | <input type="checkbox"/> |

# Teil I: Organisationale Gerechtigkeit - Pflegende Teil 1

Die nachfolgenden Fragen beziehen sich auf die organisationale Gerechtigkeit. (Bitte je eine Angabe pro Zeile)

## I1.

*\* zutreffende Informationen beziehen sich darauf, ob die Dienstplanung so erstellt wurde, wie es Ihnen von der / dem Planungsverantwortlichen vorgängig kommuniziert wurde.*

|                                                                                | 1 = überhaupt<br>nicht beziehu<br>ngsweise fast<br>nie | 2                        | 3                        | 4                        | 5 = voll und<br>ganz beziehu<br>ngsweise oft |
|--------------------------------------------------------------------------------|--------------------------------------------------------|--------------------------|--------------------------|--------------------------|----------------------------------------------|
| Wie sehr konnten Sie Ihre Sichtweisen und Empfindungen während der             | <input type="checkbox"/>                               | <input type="checkbox"/> | <input type="checkbox"/> | <input type="checkbox"/> | <input type="checkbox"/>                     |
| Wie sehr hatten Sie Einfluss auf die Dienstplanung?                            | <input type="checkbox"/>                               | <input type="checkbox"/> | <input type="checkbox"/> | <input type="checkbox"/> | <input type="checkbox"/>                     |
| Wie sehr wurde die Dienstplanung einheitlich angewandt?                        | <input type="checkbox"/>                               | <input type="checkbox"/> | <input type="checkbox"/> | <input type="checkbox"/> | <input type="checkbox"/>                     |
| Wie sehr war die Dienstplanung unvoreingenommen?                               | <input type="checkbox"/>                               | <input type="checkbox"/> | <input type="checkbox"/> | <input type="checkbox"/> | <input type="checkbox"/>                     |
| Wie sehr basiert die Dienstplanung auf zutreffenden Informationen? *           | <input type="checkbox"/>                               | <input type="checkbox"/> | <input type="checkbox"/> | <input type="checkbox"/> | <input type="checkbox"/>                     |
| Wie sehr war es Ihnen möglich, gegen die Dienstplanung Widerspruch einzulegen? | <input type="checkbox"/>                               | <input type="checkbox"/> | <input type="checkbox"/> | <input type="checkbox"/> | <input type="checkbox"/>                     |
| Wie sehr wurden während der Dienstplanung ethische und moralische Standards    | <input type="checkbox"/>                               | <input type="checkbox"/> | <input type="checkbox"/> | <input type="checkbox"/> | <input type="checkbox"/>                     |

# Teil J: Organisationale Gerechtigkeit - Pflegende Teil 2

Die folgenden Fragen beziehen sich auf die Dienstplanung.

## J1.

|                                                                                     | 1 = überhaupt<br>nicht beziehu<br>ngsweise fast<br>nie | 2                        | 3                        | 4                        | 5 = voll und<br>ganz beziehu<br>ngsweise oft |
|-------------------------------------------------------------------------------------|--------------------------------------------------------|--------------------------|--------------------------|--------------------------|----------------------------------------------|
| Wie sehr spiegelt Ihre Dienstplanung den Aufwand wider, den Sie in die Arbeit       | <input type="checkbox"/>                               | <input type="checkbox"/> | <input type="checkbox"/> | <input type="checkbox"/> | <input type="checkbox"/>                     |
| Wie sehr ist Ihre Dienstplanung angemessen für die Arbeit, die Sie geleistet haben? | <input type="checkbox"/>                               | <input type="checkbox"/> | <input type="checkbox"/> | <input type="checkbox"/> | <input type="checkbox"/>                     |
| Wie sehr spiegelt Ihre Dienstplanung den Beitrag wider, den Sie für die             | <input type="checkbox"/>                               | <input type="checkbox"/> | <input type="checkbox"/> | <input type="checkbox"/> | <input type="checkbox"/>                     |
| Wie sehr ist Ihre Dienstplanung im Verhältnis zu Ihrer Leistung gerechtfertigt?     | <input type="checkbox"/>                               | <input type="checkbox"/> | <input type="checkbox"/> | <input type="checkbox"/> | <input type="checkbox"/>                     |

# Teil K: Organisationale Gerechtigkeit - Pflegende Teil 3

Die folgenden Fragen beziehen sich auf die Person, welche die Dienstplanung durchgeführt hat.

## K1.

|                                                                                   | 1 = überhaupt<br>nicht beziehu<br>ngsweise fast<br>nie | 2                        | 3                        | 4                        | 5 = voll und<br>ganz beziehu<br>ngsweise oft |
|-----------------------------------------------------------------------------------|--------------------------------------------------------|--------------------------|--------------------------|--------------------------|----------------------------------------------|
| Wie sehr hat die / der Planungsverantwortliche Sie höflich behandelt?             | <input type="checkbox"/>                               | <input type="checkbox"/> | <input type="checkbox"/> | <input type="checkbox"/> | <input type="checkbox"/>                     |
| Wie sehr hat die / der Planungsverantwortliche Sie mit Würde behandelt?           | <input type="checkbox"/>                               | <input type="checkbox"/> | <input type="checkbox"/> | <input type="checkbox"/> | <input type="checkbox"/>                     |
| Wie sehr hat die / der Planungsverantwortliche Sie mit Respekt behandelt?         | <input type="checkbox"/>                               | <input type="checkbox"/> | <input type="checkbox"/> | <input type="checkbox"/> | <input type="checkbox"/>                     |
| Wie sehr hat die / der Planungsverantwortliche unangemessene Bemerkungen und      | <input type="checkbox"/>                               | <input type="checkbox"/> | <input type="checkbox"/> | <input type="checkbox"/> | <input type="checkbox"/>                     |
| Wie sehr hat die / der Planungsverantwortliche sich in ihren Auskünften offen und | <input type="checkbox"/>                               | <input type="checkbox"/> | <input type="checkbox"/> | <input type="checkbox"/> | <input type="checkbox"/>                     |
| Wie sehr hat die / der Planungsverantwortliche das Verfahren gründlich erklärt?   | <input type="checkbox"/>                               | <input type="checkbox"/> | <input type="checkbox"/> | <input type="checkbox"/> | <input type="checkbox"/>                     |
| Wie sehr waren die Erklärungen die / der Planungsverantwortlichen zum Verfahren   | <input type="checkbox"/>                               | <input type="checkbox"/> | <input type="checkbox"/> | <input type="checkbox"/> | <input type="checkbox"/>                     |
| Wie sehr hat die / der Planungsverantwortliche Ihnen Einzelheiten rechtzeitig     | <input type="checkbox"/>                               | <input type="checkbox"/> | <input type="checkbox"/> | <input type="checkbox"/> | <input type="checkbox"/>                     |
| Wie sehr hat die / der Planungsverantwortliche ihre Erklärungen auf Ihre          | <input type="checkbox"/>                               | <input type="checkbox"/> | <input type="checkbox"/> | <input type="checkbox"/> | <input type="checkbox"/>                     |

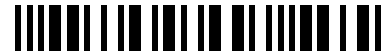

## Teil L: Organisationale Gerechtigkeit - Planungsverantwortliche Teil 1

Die folgenden Fragen beziehen sich auf das Vorgehen zum Erstellen der Dienstplanung. Sie beziehen sich auf das Team, für welches Sie die Dienstplanung erstellen.

### L1.

\* zutreffende Informationen beziehen sich darauf, ob Sie die Dienstplanung so erstellen, wie Sie es vorgängig Ihrem Team kommuniziert haben.

|                                                                             | 1 = überhaupt<br>nicht beziehu<br>ngsweise fast<br>nie | 2                        | 3                        | 4                        | 5 = voll und<br>ganz beziehu<br>ngsweise oft |
|-----------------------------------------------------------------------------|--------------------------------------------------------|--------------------------|--------------------------|--------------------------|----------------------------------------------|
| Wie sehr konnte Ihr Team seine Sichtweisen und Empfindungen während der     | <input type="checkbox"/>                               | <input type="checkbox"/> | <input type="checkbox"/> | <input type="checkbox"/> | <input type="checkbox"/>                     |
| Wie sehr hatte Ihr Team Einfluss auf die Dienstplanung?                     | <input type="checkbox"/>                               | <input type="checkbox"/> | <input type="checkbox"/> | <input type="checkbox"/> | <input type="checkbox"/>                     |
| Wie sehr wurde die Dienstplanung einheitlich angewandt?                     | <input type="checkbox"/>                               | <input type="checkbox"/> | <input type="checkbox"/> | <input type="checkbox"/> | <input type="checkbox"/>                     |
| Wie sehr war die Dienstplanung unvoreingenommen?                            | <input type="checkbox"/>                               | <input type="checkbox"/> | <input type="checkbox"/> | <input type="checkbox"/> | <input type="checkbox"/>                     |
| Wie sehr basiert die Dienstplanung auf zutreffenden Informationen? *        | <input type="checkbox"/>                               | <input type="checkbox"/> | <input type="checkbox"/> | <input type="checkbox"/> | <input type="checkbox"/>                     |
| Wie sehr war es Ihrem Team möglich, gegen die Dienstplanung Widerspruch     | <input type="checkbox"/>                               | <input type="checkbox"/> | <input type="checkbox"/> | <input type="checkbox"/> | <input type="checkbox"/>                     |
| Wie sehr wurden während der Dienstplanung ethische und moralische Standards | <input type="checkbox"/>                               | <input type="checkbox"/> | <input type="checkbox"/> | <input type="checkbox"/> | <input type="checkbox"/>                     |

## Teil M: Organisationale Gerechtigkeit - Planungsverantwortliche Teil 2

Die folgenden Fragen beziehen sich auf die Dienstplanung. Sie beziehen sich auf das Team, für welches Sie die Dienstplanung erstellen.

### M1.

|                                                                                   | 1 = überhaupt<br>nicht beziehu<br>ngsweise fast<br>nie | 2                        | 3                        | 4                        | 5 = voll und<br>ganz beziehu<br>ngsweise oft |
|-----------------------------------------------------------------------------------|--------------------------------------------------------|--------------------------|--------------------------|--------------------------|----------------------------------------------|
| Wie sehr spiegelt Ihre Dienstplanung den Aufwand wider, den Ihr Team in die       | <input type="checkbox"/>                               | <input type="checkbox"/> | <input type="checkbox"/> | <input type="checkbox"/> | <input type="checkbox"/>                     |
| Wie sehr ist Ihre Dienstplanung angemessen für die Arbeit, die Ihr Team geleistet | <input type="checkbox"/>                               | <input type="checkbox"/> | <input type="checkbox"/> | <input type="checkbox"/> | <input type="checkbox"/>                     |
| Wie sehr spiegelt Ihre Dienstplanung den Beitrag wider, den Ihr Team für die      | <input type="checkbox"/>                               | <input type="checkbox"/> | <input type="checkbox"/> | <input type="checkbox"/> | <input type="checkbox"/>                     |
| Wie sehr ist Ihre Dienstplanung im Verhältnis zu der Leistung Ihres Teams         | <input type="checkbox"/>                               | <input type="checkbox"/> | <input type="checkbox"/> | <input type="checkbox"/> | <input type="checkbox"/>                     |

## Teil N: Organisationale Gerechtigkeit - Planungsverantwortliche Teil 3

Die folgenden Fragen beziehen sich auf die Person, welche die Dienstplanung durchgeführt hat.

### N1.

|                                                                                  | 1 = überhaupt<br>nicht beziehu<br>ngsweise fast<br>nie | 2                        | 3                        | 4                        | 5 = voll und<br>ganz beziehu<br>ngsweise oft |
|----------------------------------------------------------------------------------|--------------------------------------------------------|--------------------------|--------------------------|--------------------------|----------------------------------------------|
| Wie sehr haben Sie Ihr Team höflich behandelt?                                   | <input type="checkbox"/>                               | <input type="checkbox"/> | <input type="checkbox"/> | <input type="checkbox"/> | <input type="checkbox"/>                     |
| Wie sehr haben Sie Ihr Team mit Würde behandelt?                                 | <input type="checkbox"/>                               | <input type="checkbox"/> | <input type="checkbox"/> | <input type="checkbox"/> | <input type="checkbox"/>                     |
| Wie sehr haben Sie Ihr Team mit Respekt behandelt?                               | <input type="checkbox"/>                               | <input type="checkbox"/> | <input type="checkbox"/> | <input type="checkbox"/> | <input type="checkbox"/>                     |
| Wie sehr haben Sie bei Ihrem Team unangemessene Bemerkungen und                  | <input type="checkbox"/>                               | <input type="checkbox"/> | <input type="checkbox"/> | <input type="checkbox"/> | <input type="checkbox"/>                     |
| Wie sehr haben Sie sich gegenüber Ihrem Team in Ihren Auskünften offen und       | <input type="checkbox"/>                               | <input type="checkbox"/> | <input type="checkbox"/> | <input type="checkbox"/> | <input type="checkbox"/>                     |
| Wie sehr haben Sie Ihrem Team das Verfahren gründlich erklärt?                   | <input type="checkbox"/>                               | <input type="checkbox"/> | <input type="checkbox"/> | <input type="checkbox"/> | <input type="checkbox"/>                     |
| Wie sehr waren Ihre Erklärungen zum Verfahren nachvollziehbar?                   | <input type="checkbox"/>                               | <input type="checkbox"/> | <input type="checkbox"/> | <input type="checkbox"/> | <input type="checkbox"/>                     |
| Wie sehr haben Sie Ihrem Team Einzelheiten rechtzeitig mitgeteilt?               | <input type="checkbox"/>                               | <input type="checkbox"/> | <input type="checkbox"/> | <input type="checkbox"/> | <input type="checkbox"/>                     |
| Wie sehr haben Sie Ihrem Team Ihre Erklärungen auf ihre persönlichen Bedürfnisse | <input type="checkbox"/>                               | <input type="checkbox"/> | <input type="checkbox"/> | <input type="checkbox"/> | <input type="checkbox"/>                     |

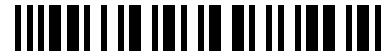

## Teil O: Arbeitszufriedenheit

Die folgenden Fragen beziehen sich auf die Arbeitszufriedenheit. (Bitte je eine Angabe pro Zeile)

Wenn Sie Ihre Arbeitssituation insgesamt betrachten, wie zufrieden sind Sie mit...

### O1.

|                                                                         | 1 = sehr<br>unzufrieden  | 2 =<br>unzufrieden       | 3 = teils-<br>teils      | 4 =<br>zufrieden         | 5 = sehr<br>zufrieden    |
|-------------------------------------------------------------------------|--------------------------|--------------------------|--------------------------|--------------------------|--------------------------|
| ... Ihren Berufsperspektiven?                                           | <input type="checkbox"/> |
| ... den Leuten, mit denen Sie arbeiten?                                 | <input type="checkbox"/> |
| ... den körperlichen Arbeitsbedingungen?                                | <input type="checkbox"/> |
| ... der Art und Weise, wie Ihre Abteilung geführt wird?                 | <input type="checkbox"/> |
| ... der Art und Weise, wie Ihre Fähigkeiten genutzt werden?             | <input type="checkbox"/> |
| ... den Herausforderungen und Fertigkeiten, die Ihre Arbeit beinhaltet? | <input type="checkbox"/> |
| ... Ihrer Arbeit insgesamt, unter Berücksichtigung aller Umstände?      | <input type="checkbox"/> |

**Vielen Dank für Ihre wertvolle Teilnahme!**

**Für weitere Auskünfte und Informationen stehe ich Ihnen gerne zur Verfügung: [corinne.hofer.2@students.bfh.ch](mailto:corinne.hofer.2@students.bfh.ch)**
